# Supplementary material for: Brain Alterations in Aged OVT73 Sheep Model of Huntington’s Disease: An MRI Based Approach
Source: PubMed Central journal article supplement — J Huntingtons Dis. 2022 Dec 16;11(4):391–406. doi: 10.3233/JHD-220526 (PMC9837686; doi:10.3233/jhd-220526), 2022-12-16
Supplement: jhd-11-jhd220526-s001.pdf [file jhd-11-jhd220526-s001.pdf]

# Supplementary Material

## Brain Alterations in Aged OVT73 Sheep Model of Huntington's Disease: An MRI Based Approach

**Supplementary Figure 1.** Percentage of change of DTI scalars in HD sheep with respect to the control sheep for 7-year-old males and 9- and 10-year-old females. The DTI scalars calculated in regions of interest (ROIs) located in corpus callosum, rostral and caudal internal capsule, midbrain, motor, parietal, and occipital cortices. Red bars show the change that is significantly different than control sheep. Ram and ewe are male and female sheep respectively.

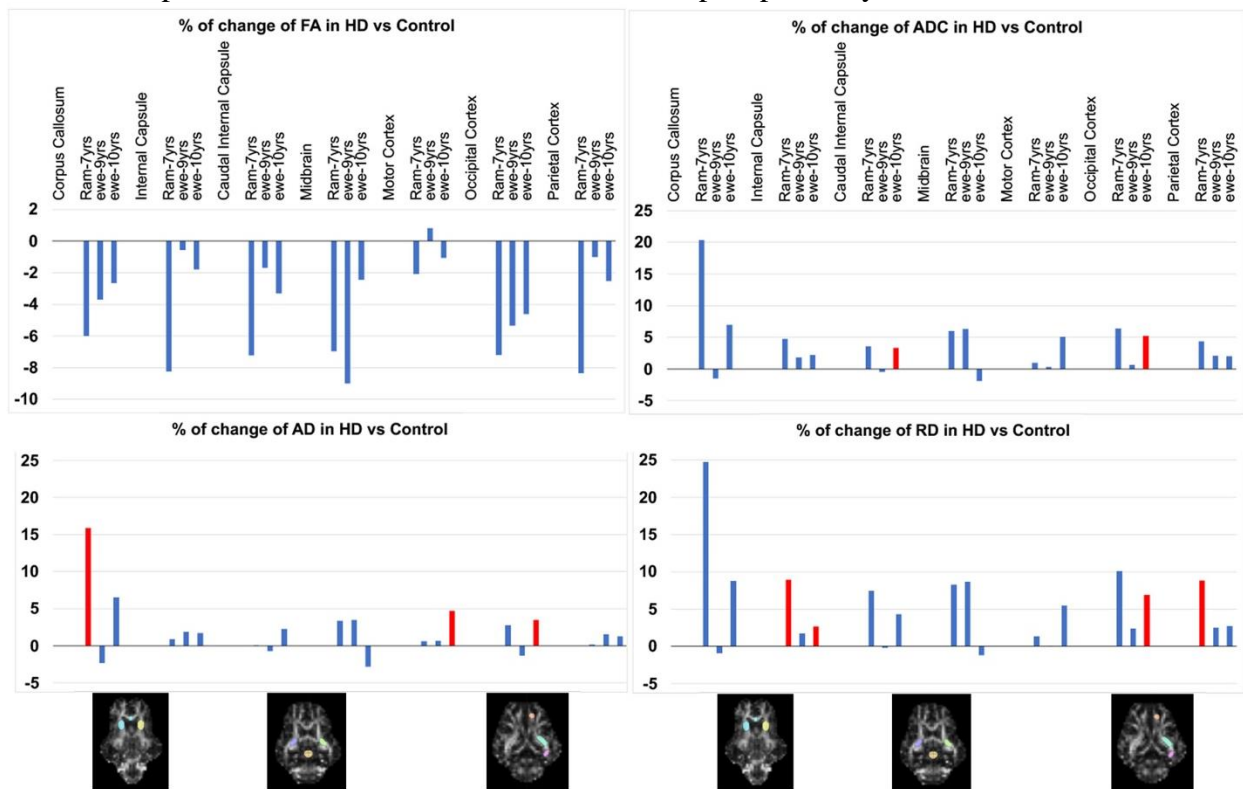

**Supplementary Figure 2.** A) Example of MR spectroscopy data set. B) Visual representation of percentage of total change of metabolite concentrations in 9- and 10-year-old HD females with respect to the control female sheep.

**A**

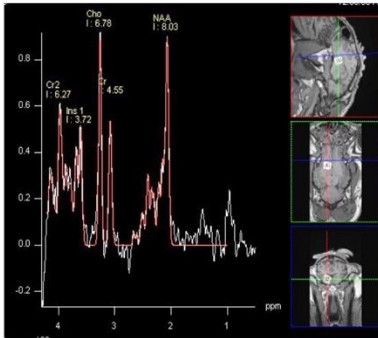

**B**

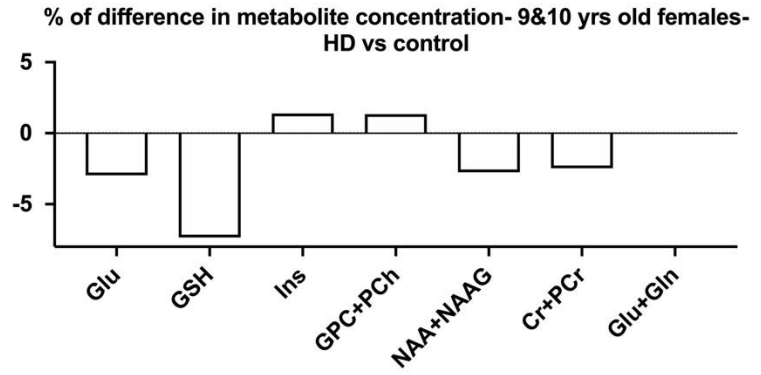

**Supplementary Table 1.** Quantified values of mHTT, DTI scalars, and MRS for sheep in longitudinal study.

| female sheep numbers-longitudinal study | transgenic |       |        |       |        | normal |       |       |       |         |
|-----------------------------------------|------------|-------|--------|-------|--------|--------|-------|-------|-------|---------|
|                                         | HD807      | HD822 | HD849  | HD851 | HD869  | HD843  | HD845 | HD873 | HD882 |         |
| <b>mHTT</b>                             |            |       |        |       |        |        |       |       |       |         |
| MEAN HTT levels [fM]-9-year-old         | 32.92      | 79.75 | 134.19 | 98.66 | 124.18 | 12.02  | 0.00  | 0.84  | 0.00  | Fig. 1C |
| MEAN HTT levels [fM]-10-year-old        | 111.01     | 93.84 | 104.90 | 48.89 | 157.83 | 14.17  | 21.21 | 33.50 | 9.39  | Fig. 1C |
| <b>DTI</b>                              |            |       |        |       |        |        |       |       |       |         |
| Internal Capsule-FA-9-year-old          | 1.01       | 1.16  | 0.97   |       | 1.05   | 0.95   | 1.05  | 1.00  |       | Fig. 3B |
| Internal Capsule-FA-10-year-old         | 0.88       | 0.82  | 0.94   |       | 0.89   | 1.00   | 1.02  | 0.98  |       | Fig. 3B |
| Caudal Internal Capsule-FA-9-year-old   | 1.04       | 1.15  | 1.01   |       | 1.03   | 0.96   | 1.03  | 1.01  |       | Fig. 3B |
| Caudal Internal Capsule-FA-10-year-old  | 0.94       | 0.94  | 1.01   |       | 0.95   | 1.02   | 0.96  | 1.02  |       | Fig. 3B |
| Motor cortex-FA-9-year-old              | 1.05       | 1.20  | 0.98   |       | 1.06   | 1.00   | 1.07  | 0.93  |       | Fig. 3B |
| Motor cortex-FA-10-year-old             | 0.95       | 0.83  | 0.95   |       | 0.83   | 1.00   | 1.00  | 1.00  |       | Fig. 3B |
| Parietal cortex-FA-9-year-old           | 1.07       | 1.16  | 0.99   |       | 1.05   | 0.98   | 1.03  | 0.99  |       | Fig. 3B |
| Parietal cortex-FA-10-year-old          | 0.96       | 0.93  | 0.95   |       | 0.94   | 1.00   | 0.94  | 1.05  |       | Fig. 3B |
| Occipital cortex-FA-9-year-old          | 1.03       | 1.02  | 0.95   |       | 0.97   | 0.91   | 1.06  | 1.03  |       | Fig. 3B |
| Occipital cortex-FA-10-year-old         | 0.94       | 0.90  | 0.99   |       | 0.90   | 0.97   | 0.98  | 1.05  |       | Fig. 3B |
| Internal Capsule-ADC-9-year-old         | 0.98       | 0.92  | 1.00   |       | 0.95   | 1.00   | 0.98  | 1.02  |       | Fig. 3C |
| Internal Capsule-ADC-10-year-old        | 1.06       | 1.14  | 1.06   |       | 1.03   | 1.01   | 0.97  | 1.02  |       | Fig. 3C |
| Caudal Internal Capsule-ADC-9-year-old  | 0.94       | 0.97  | 1.06   |       | 0.95   | 1.01   | 0.99  | 1.00  |       | Fig. 3C |
| Caudal Internal Capsule-ADC-10-year-old | 1.06       | 1.09  | 1.03   |       | 1.00   | 1.00   | 1.02  | 0.98  |       | Fig. 3C |
| Motor cortex-ADC-9-year-old             | 1.03       | 0.84  | 1.11   |       | 0.91   | 1.04   | 0.96  | 1.00  |       | Fig. 3C |
| Motor cortex-ADC-10-year-old            | 1.05       | 1.11  | 1.04   |       | 1.12   | 0.99   | 1.01  | 1.00  |       | Fig. 3C |
| Parietal cortex-ADC-9-year-old          | 0.93       | 1.00  | 1.05   |       | 0.93   | 1.00   | 0.98  | 1.02  |       | Fig. 3C |
| Parietal cortex-ADC-10-year-old         | 1.03       | 1.08  | 1.08   |       | 1.01   | 1.04   | 0.99  | 0.97  |       | Fig. 3C |
| Occipital cortex-ADC-9-year-old         | 0.92       | 0.96  | 1.09   |       | 0.95   | 1.03   | 0.97  | 1.00  |       | Fig. 3C |
| Occipital cortex-ADC-10-year-old        | 1.04       | 1.07  | 1.16   |       | 1.10   | 1.02   | 0.99  | 0.98  |       | Fig. 3C |
| Internal Capsule-RD-9-year-old          | 0.98       | 0.88  | 1.01   |       | 0.93   | 1.01   | 0.96  | 1.03  |       | Fig. 3D |
| Internal Capsule-RD-10-year-old         | 1.10       | 1.22  | 1.08   |       | 1.06   | 1.01   | 0.96  | 1.03  |       | Fig. 3D |
| Caudal Internal Capsule-RD-9-year-old   | 0.93       | 0.94  | 1.06   |       | 0.93   | 1.02   | 0.97  | 1.01  |       | Fig. 3D |
| Caudal Internal Capsule-RD-10-year-old  | 1.08       | 1.11  | 1.02   |       | 1.00   | 1.00   | 1.03  | 0.97  |       | Fig. 3D |
| Motor cortex-RD-9-year-old              | 1.03       | 0.80  | 1.11   |       | 0.89   | 1.05   | 0.94  | 1.02  |       | Fig. 3D |
| Motor cortex-RD-10-year-old             | 1.05       | 1.17  | 1.06   |       | 1.18   | 0.98   | 1.01  | 1.01  |       | Fig. 3D |
| Parietal cortex-RD-9-year-old           | 0.92       | 0.96  | 1.05   |       | 0.91   | 1.01   | 0.96  | 1.03  |       | Fig. 3D |
| Parietal cortex-RD-10-year-old          | 1.03       | 1.10  | 1.08   |       | 1.02   | 1.04   | 1.00  | 0.96  |       | Fig. 3D |
| Occipital cortex-RD-9-year-old          | 0.92       | 0.97  | 1.11   |       | 0.97   | 1.06   | 0.94  | 1.00  |       | Fig. 3D |
| Occipital cortex-RD-10-year-old         | 1.05       | 1.09  | 1.16   |       | 1.12   | 1.04   | 0.99  | 0.97  |       | Fig. 3D |
| <b>MRS</b>                              |            |       |        |       |        |        |       |       |       |         |
| Ins-9-year-old                          | 0.91       | 0.90  | 0.39   | 0.71  | 0.69   |        |       | 1.09  | 0.91  | Fig. 5A |
| Ins-10-year-old                         | 1.17       | 1.04  | 0.99   | 2.03  | 1.04   |        |       | 1.03  | 1.06  | Fig. 5A |
| NAA-9-year-old                          | 0.96       | 1.13  | 1.23   | 1.27  | 1.20   | 1.01   | 1.05  | 0.93  | 1.02  | Fig. 5A |
| NAA-10-year-old                         | 0.97       | 0.88  | 0.99   | 1.17  | 0.78   | 0.94   | 1.04  | 1.10  | 0.92  | Fig. 5A |
| NAA+NAAG-9-year-old                     | 0.92       | 1.03  | 1.08   | 1.02  | 0.97   |        | 1.03  | 0.98  | 0.95  | Fig. 5A |
| NAA+NAAG-10-year-old                    | 0.92       | 0.91  | 0.79   | 1.01  | 0.76   |        | 1.08  | 0.96  | 0.95  | Fig. 5A |
| GPC+PCh-9-year-old                      | 0.99       | 1.05  | 0.96   | 0.93  | 0.96   | 0.96   |       |       | 1.00  | Fig. 5A |
| GPC+PCh-10-year-old                     | 1.21       | 0.89  | 0.93   | 1.12  | 0.89   | 0.96   |       |       | 1.02  | Fig. 5A |

DTI files lost in data transfer accidentally deleted

DTI files lost in data transfer accidentally deleted

**Supplementary Table 2.** DTI acquisition parameters for each group of sheep in the study.

| <b>Sheep groups</b>         | <b>DTI voxel size</b>       | <b>Figure # illustrating the data</b> |
|-----------------------------|-----------------------------|---------------------------------------|
| 7-year-old male sheep       | 2.5X2.5X2.5 mm <sup>3</sup> | Fig. 2                                |
| 9-year-old female sheep     | 2.5X2.5X2.5 mm <sup>3</sup> | Fig. 2                                |
| 10-year-old female sheep    | 2X2X2 mm <sup>3</sup>       | Fig. 2                                |
| sheep in longitudinal study | 2.5X2.5X2.5 mm <sup>3</sup> | Fig. 3                                |
